# Supplementary material for: Sugarsquare, a Web-Based Patient Portal for Parents of a Child With Type 1 Diabetes: Multicenter Randomized Controlled Feasibility Trial
Source: PubMed Central journal article supplement (PMC5585595; doi:10.2196/jmir.6639), 2017-08-22

## Screenshot 1: Screenshots Log-in screen

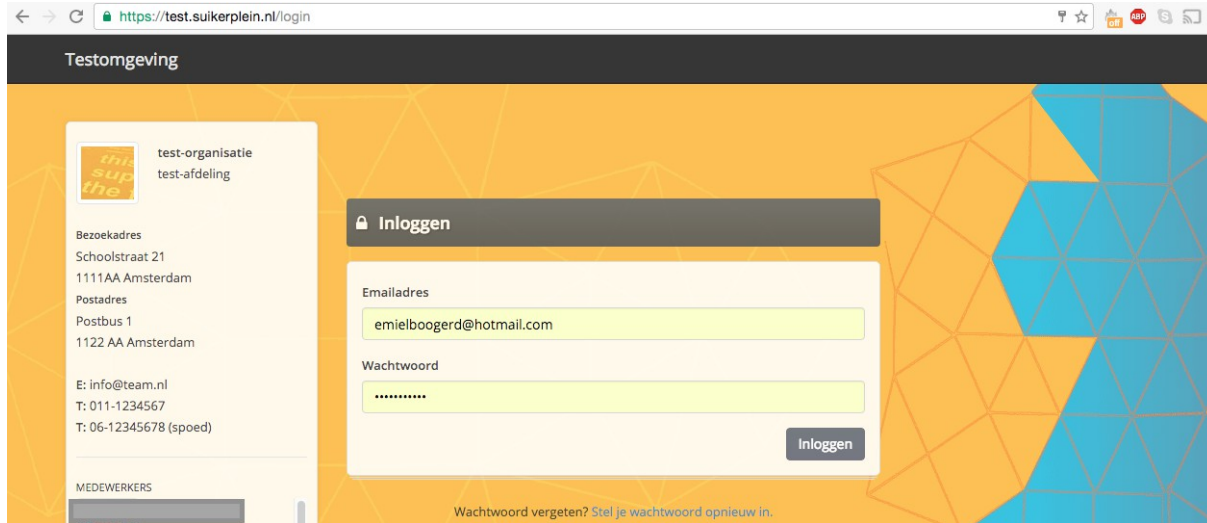

## Screenshot 2: Screenshot home-screen and timeline

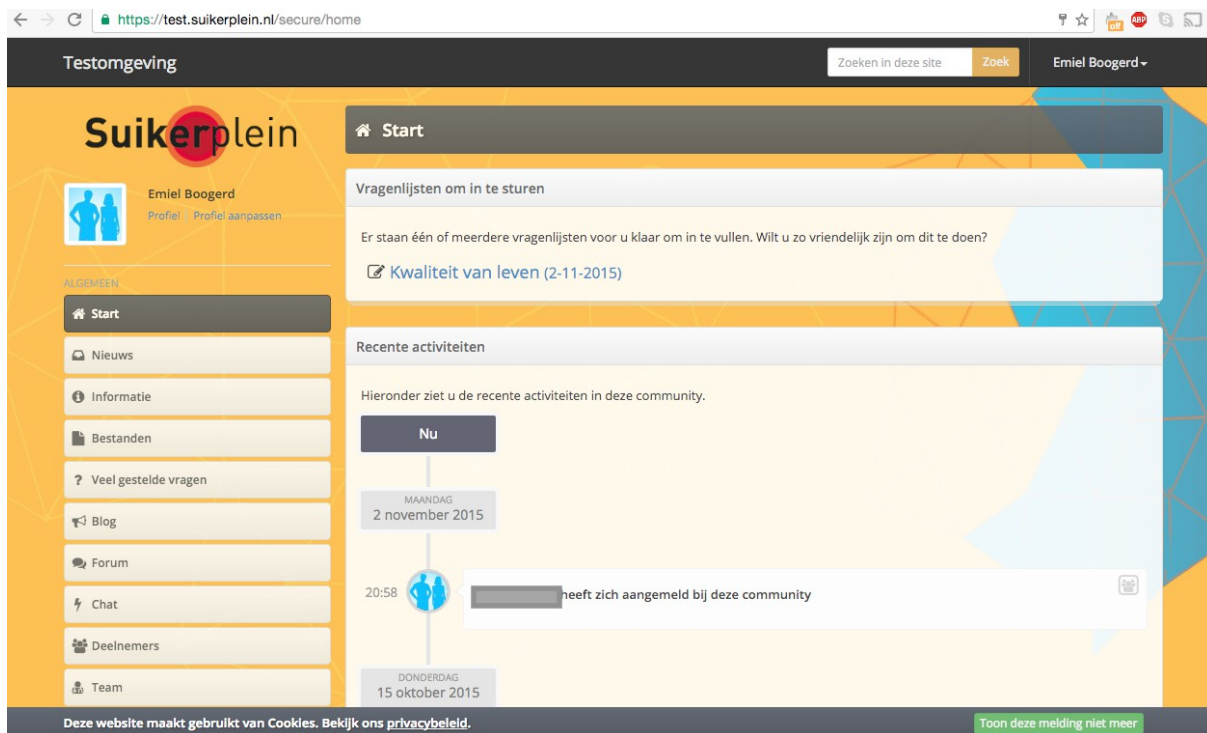

### Screenshot 3: Screenshot forumdiscussion

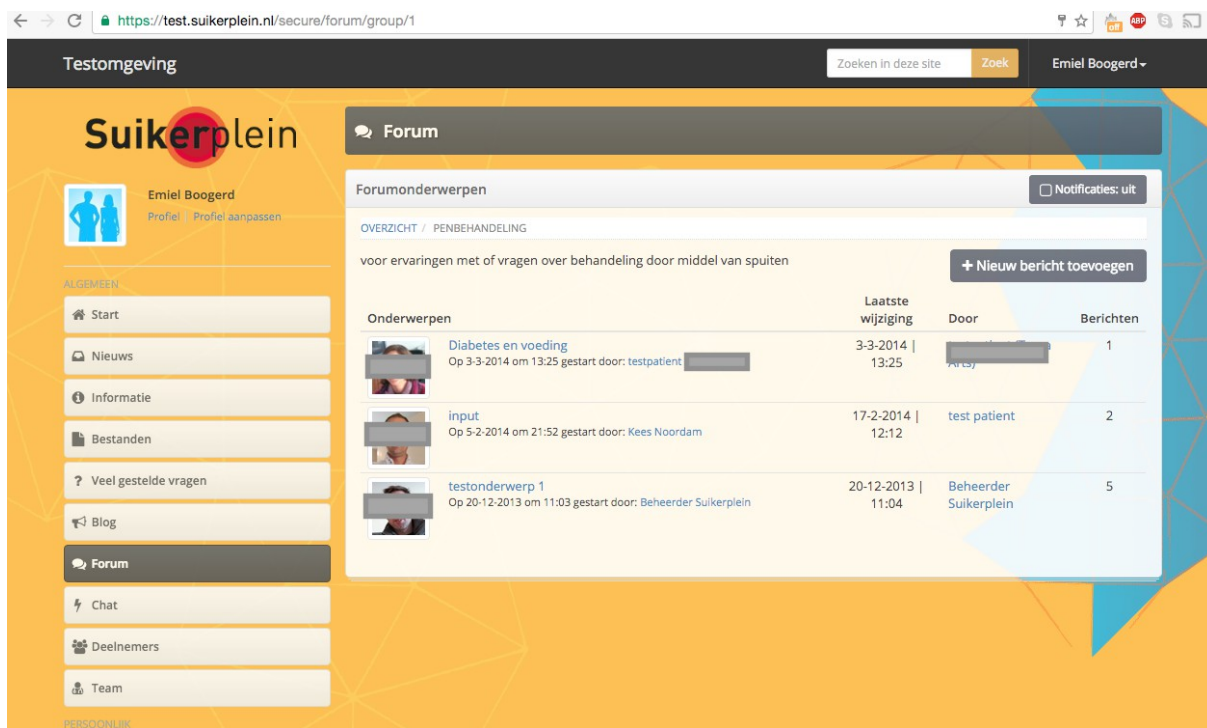

### Screenshot 4: Screenshot private interaction

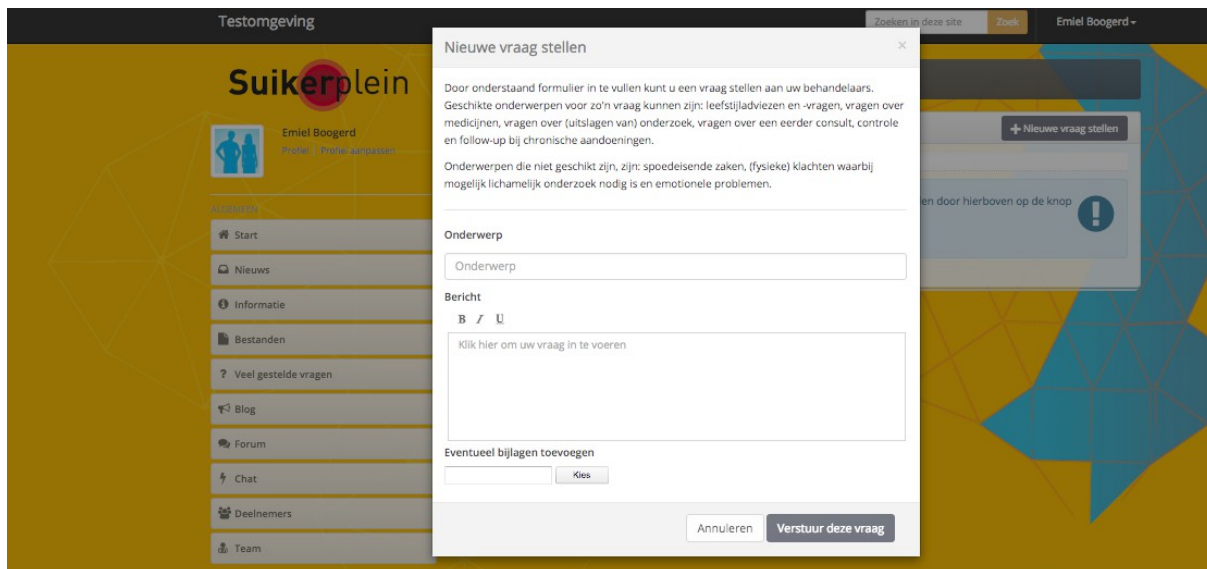

Screenshot 5: Screenshot menu

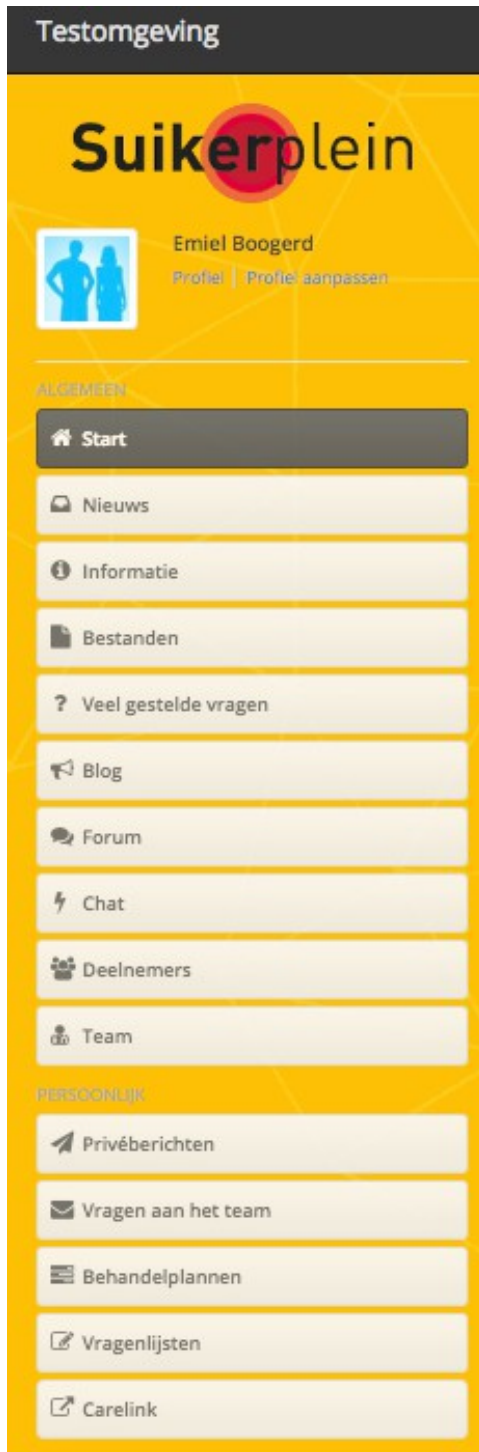

Supplement: jmir_v19i8e287_app1.pdf [file jmir_v19i8e287_app1.pdf]
